# Supplementary material for: Outcomes of Patients With Severe Symptomatic Aortic Valve Stenosis After Chest Radiation: Transcatheter Versus Surgical Aortic Valve Replacement
Source: PubMed Central journal article supplement — J Am Heart Assoc. 2019 May 24;8(10):e012110. doi: 10.1161/JAHA.119.012110 (PMC6585322; doi:10.1161/jaha.119.012110), 2019-05-24
Supplement: JAH3-8-e012110-s001.pdf [file JAH3-8-e012110-s001.pdf]

# **Supplemental Material**

**Table S1. Reasons for hospital readmission in SAVR and TAVR patients.**

| <b>Patient</b>                                | <b>Days after operation</b> | <b>Reason for hospitalization</b>                                       |
|-----------------------------------------------|-----------------------------|-------------------------------------------------------------------------|
| <b>Surgical aortic valve replacement</b>      |                             |                                                                         |
| #1                                            | 18                          | Chest incision drainage                                                 |
| #2                                            | 21                          | Increase mean prosthetic mitral valve gradient                          |
| #3                                            | 126                         | Left carotid stenosis                                                   |
| #4                                            | 146                         | Recurrent symptomatic pleural effusions.                                |
| #5                                            | 13                          | Arrhythmia                                                              |
| <b>Transcatheter aortic valve replacement</b> |                             |                                                                         |
| #1                                            | 57                          | Recurrent bilateral pleural effusions                                   |
| #2                                            | 60                          | Atrial fibrillation                                                     |
| #3                                            | 39                          | Prosthetic aortic valve endocarditis with <i>Pseudomonas aeruginosa</i> |
| #4                                            | 17                          | Heart failure                                                           |
| #5                                            | 12                          | Atrial fibrillation                                                     |
| #6                                            | 143                         | Respiratory failure                                                     |
| #7                                            | 424                         | Aortic valve regurgitation                                              |
| #8                                            | 70                          | Atrial flutter                                                          |
| #9                                            | 33                          | Heart failure                                                           |
| #10                                           | 64                          | Respiratory failure                                                     |
| #11                                           | 159                         | Indeterminate spells                                                    |
| #12                                           | 96                          | Inability to perform self-cares, multifactorial                         |
| #13                                           | 43                          | Sepsis                                                                  |
| #14                                           | 364                         | Heart failure                                                           |
| #15                                           | 19                          | Heart failure                                                           |

|     |     |                                                     |
|-----|-----|-----------------------------------------------------|
| #16 | 31  | Disabling claudication of the right lower extremity |
| #17 | 33  | Healthcare associated pneumonia                     |
| #18 | 86  | Gastrointestinal bleed                              |
| #19 | 165 | Disabling claudication of the right lower extremity |
| #20 | 24  | Inflammatory pericarditis                           |
| #21 | 141 | Streptococcus mitis endocarditis                    |
| #22 | 106 | Fall from standing height                           |
| #23 | 22  | Streptococcus mitis endocarditis                    |
| #24 | 9   | Left groin pseudoaneurysm                           |
| #25 | 15  | High-grade AV block                                 |
| #26 | 59  | Pancreatic adenocarcinoma                           |

**Figure S1. Patient flow chart for the cohort of patients included in this study.**

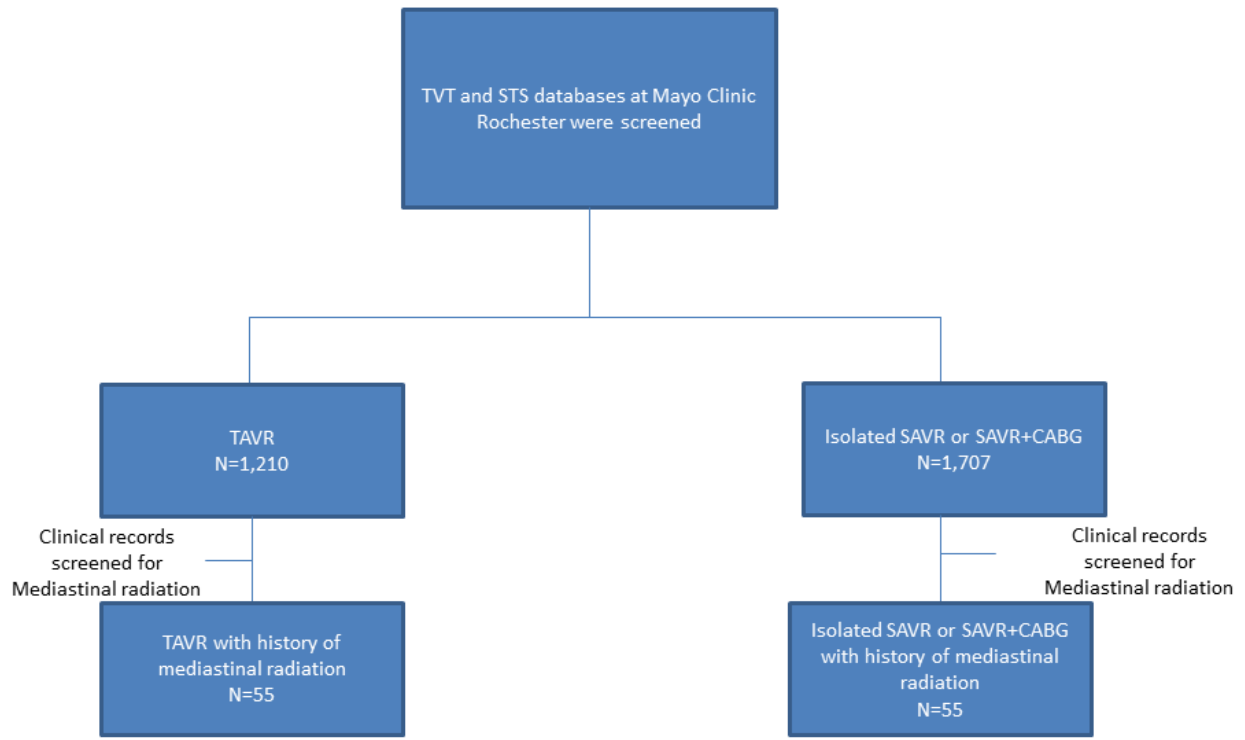

CABG: coronary artery bypass grafting, SAVR: surgical aortic valve replacement, TAVR: transcatheter aortic valve replacement.

**Figure S2. A: Unadjusted Kaplan-Meier curves for survival at 1 year follow-up for patients undergoing transcatheter aortic valve replacement (TAVR) with and without low flow-low gradient aortic stenosis (LF-LG AS), (HR 4.81, 95% CI 1.29-17.91, p=0.02); B: Inverse probability of treatment weighting-adjusted Kaplan-Meier curves for survival at 1 year follow-up for the two specified groups, (HR 4.80, 95% CI 1.96-11.73, p=0.0006).**

**A**

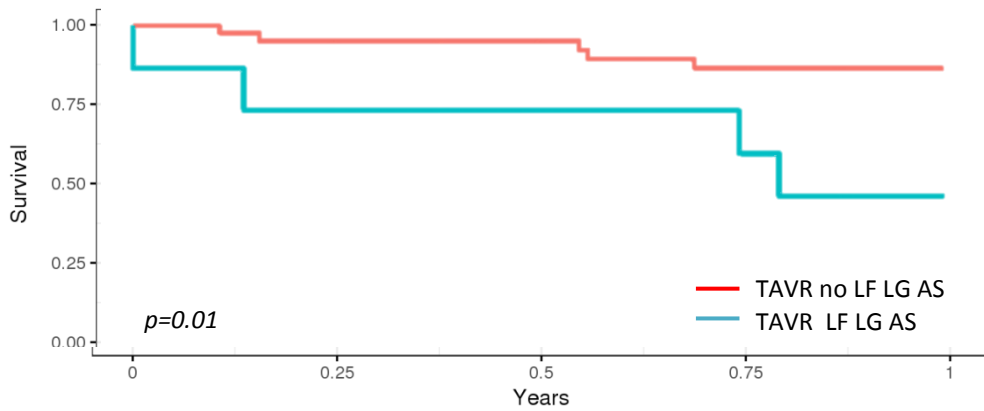

|      |    |    |    |    |    |
|------|----|----|----|----|----|
| SAVR | 45 | 40 | 37 | 32 | 29 |
| TAVR | 8  | 6  | 6  | 6  | 3  |

**B**

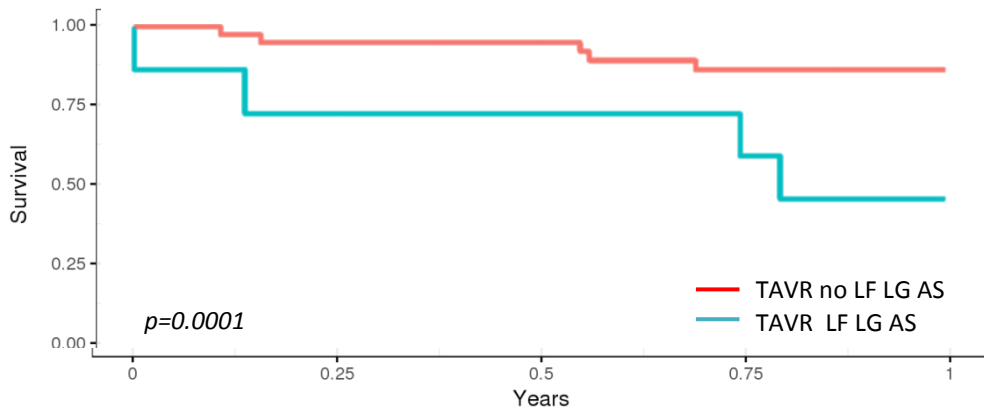

|      |    |    |    |    |    |
|------|----|----|----|----|----|
| SAVR | 45 | 40 | 37 | 32 | 29 |
| TAVR | 8  | 6  | 6  | 5  | 3  |
